# Supplementary material for: Chemical motifs that redox cycle and their associated toxicity
Source: Royal Society of Chemistry journal article supplement (doi:10.1039/c3md00149k), 2013-01-01
Supplement: c3md00149k.xlsx [file c3md00149k.xlsx]

## Sheet: Sheet2
Compound Name	Average EC 50 (n=3)
Pyrimidotriazinedione	0.977
Pyrimidotriazinedione	0.977
Pyrimidotriazinedione	0.977
Pyrimidotriazinedione	0.977
Pyrimidotriazinedione	0.977
Pyrimidotriazinedione	0.977
Pyrimidotriazinedione	0.977
Pyrimidotriazinedione	1.62567
Pyrimidotriazinedione	1.95
Pyrimidotriazinedione	1.95
Pyrimidotriazinedione	1.95
Pyrimidotriazinedione	2.31567
Pyrimidotriazinedione	3.67333
Pyrimidotriazinedione	0.488
Pyrimidotriazinedione	0.488
Flavin	226.333
Flavin	295.333
Flavin	254
Flavin	268
Flavin	5.59
Flavin	15
Flavin	15.2
Flavin	110
Flavin	116
Flavin	120
Flavin	123
Flavin	129
Flavin	151
Flavin	196
Flavin	250
Debenzoflavin	713.333
Deazaflavin	250
Deazaflavin	250
O-deaza-flavin	250
O-deaza-flavin	460
S-Flavin	200
S-Flavin	69.7
S-Flavin	92.5
S-Flavin	151
Quinone	921
Quinone	2.51667
Quinone	12.6333
Quinone	28.8
Quinone	33.8
Quinone	82.1333
Quinone	110.433
Quinone	147
Quinone	251
Quinone	0.488
Quinone	31.5
Quinolone	32.9
Pyridinetrione	250
Chelerythrine	277
Sanguinarine	513
Indolone	666.667
Indolone	833.333
Arylidenepyridenedione	0.5
Arylidenepyridenedione	0.5
Arylidenepyridenedione	8.64
Arylidenepyridenedione	9.19
Arylidenepyridenedione	17.6
Arylidenepyridenedione	26.3
Arylidenepyridenedione	52.6
Arylidenepyridenedione	59.6
Arylidenepyridenedione	94.7
Arylidenepyridenedione	121
Arylidenepyridenedione	233
Arylidenepyridenedione	236
Arylidenepyridenedione	250
Arylidenepyridenedione	250
Chromenoisoquinoline	10.7
xxxx	1000
xxxx	1000
xxxx	1000
xxxx	1000
xxxx	1000
xxxx	1000
xxxx	1000
xxxx	1000
xxxx	1000
xxxx	1000
xxxx	1000
xxxx	1000
xxxx	1000
xxxx	1000
xxxx	1000
xxxx	1000
xxxx	1000
xxxx	1000
xxxx	1000
xxxx	1000
xxxx	1000
xxxx	1000
xxxx	1000
xxxx	1000
xxxx	1000
xxxx	1000
xxxx	1000
xxxx	1000
xxxx	1000
xxxx	1000
xxxx	1000
xxxx	1000
xxxx	1000
xxxx	1000
xxxx	1000
xxxx	1000
xxxx	1000
xxxx	1000
xxxx	1000
xxxx	1000
xxxx	1000
xxxx	1000
xxxx	1000
xxxx	1000
xxxx	1000
xxxx	1000
xxxx	1000
xxxx	1000
xxxx	1000
xxxx	1000
xxxx	1000
xxxx	1000
xxxx	1000
xxxx	1000
xxxx	1000
xxxx	1000
xxxx	1000
xxxx	1000
xxxx	1000
xxxx	1000
xxxx	1000
xxxx	1000
xxxx	1000
xxxx	1000
xxxx	1000
xxxx	1000
xxxx	1000
xxxx	1000
xxxx	1000
xxxx	1000
xxxx	1000
xxxx	1000
xxxx	1000
xxxx	1000
xxxx	1000
xxxx	1000
xxxx	1000
xxxx	1000
xxxx	1000
xxxx	1000
xxxx	1000
xxxx	1000
xxxx	1000
xxxx	1000
xxxx	1000
xxxx	1000
xxxx	1000
xxxx	1000
xxxx	1000
xxxx	1000
xxxx	1000
xxxx	1000
xxxx	1000
xxxx	1000
xxxx	1000
xxxx	1000
xxxx	1000
xxxx	1000
xxxx	1000
xxxx	1000
xxxx	1000
xxxx	1000
xxxx	1000
xxxx	1000
xxxx	1000
xxxx	1000
xxxx	1000
xxxx	1000
xxxx	1000
xxxx	1000
xxxx	1000
xxxx	1000
xxxx	1000
xxxx	1000
xxxx	1000
xxxx	1000
xxxx	1000
xxxx	1000
xxxx	1000
xxxx	1000
xxxx	1000
xxxx	1000
xxxx	1000
xxxx	1000
xxxx	1000
xxxx	1000
xxxx	1000
xxxx	1000
xxxx	1000
xxxx	1000
xxxx	1000
xxxx	1000
xxxx	1000
xxxx	1000
xxxx	1000
xxxx	1000
xxxx	1000
xxxx	1000
xxxx	1000
xxxx	1000
xxxx	1000
xxxx	1000
xxxx	1000
xxxx	1000
xxxx	1000
xxxx	1000
xxxx	1000
xxxx	1000
xxxx	1000
xxxx	1000
xxxx	1000
xxxx	1000
xxxx	1000
xxxx	1000
xxxx	1000
xxxx	1000
xxxx	1000
xxxx	1000
xxxx	1000
xxxx	1000
xxxx	1000
xxxx	1000
xxxx	1000
xxxx	1000
xxxx	1000
xxxx	1000
xxxx	1000
xxxx	1000
xxxx	1000
xxxx	1000
xxxx	1000
xxxx	1000
xxxx	1000
xxxx	1000
xxxx	1000
xxxx	1000
xxxx	1000
xxxx	1000
xxxx	1000
xxxx	1000
xxxx	1000
xxxx	1000
xxxx	1000
xxxx	1000
xxxx	1000
xxxx	1000
xxxx	1000
xxxx	1000
xxxx	1000
xxxx	1000
xxxx	1000
xxxx	1000
xxxx	1000
xxxx	1000
xxxx	1000
xxxx	1000
xxxx	1000
xxxx	1000
xxxx	1000
xxxx	1000
xxxx	1000
xxxx	1000
xxxx	1000
xxxx	1000
xxxx	1000
xxxx	1000
xxxx	1000
xxxx	1000
xxxx	1000
xxxx	1000
xxxx	1000
xxxx	1000
xxxx	1000
xxxx	1000
xxxx	1000
xxxx	1000
xxxx	1000
xxxx	1000
xxxx	1000
xxxx	1000
xxxx	1000
xxxx	1000
xxxx	1000
xxxx	1000
xxxx	1000
xxxx	1000
xxxx	1000
xxxx	1000
xxxx	1000
xxxx	1000
xxxx	1000
xxxx	1000
xxxx	1000
xxxx	1000
xxxx	1000
xxxx	1000
xxxx	1000
xxxx	1000
xxxx	1000
xxxx	1000
xxxx	1000
xxxx	1000
xxxx	1000
xxxx	1000
xxxx	1000
xxxx	1000
xxxx	1000
xxxx	1000
xxxx	1000
xxxx	1000
xxxx	1000
xxxx	1000
xxxx	1000
xxxx	1000
xxxx	1000
xxxx	1000
xxxx	1000
xxxx	1000
xxxx	1000
xxxx	1000
xxxx	1000
xxxx	1000
xxxx	1000
xxxx	1000
xxxx	1000
xxxx	1000
xxxx	1000
xxxx	1000
xxxx	1000
xxxx	1000
xxxx	1000
xxxx	1000
xxxx	1000
xxxx	1000
xxxx	1000
xxxx	1000
xxxx	1000
xxxx	1000
xxxx	1000
xxxx	1000
xxxx	1000
xxxx	1000
xxxx	1000
xxxx	1000
xxxx	1000
xxxx	1000
xxxx	1000
xxxx	1000
xxxx	1000
xxxx	1000
xxxx	1000
xxxx	1000
xxxx	1000
xxxx	1000
xxxx	1000
xxxx	1000
xxxx	1000
xxxx	1000
xxxx	1000
xxxx	1000
xxxx	1000
xxxx	1000
xxxx	1000
xxxx	1000
xxxx	1000
xxxx	1000
xxxx	1000
xxxx	1000
xxxx	1000
xxxx	1000
xxxx	1000
xxxx	1000
xxxx	1000
xxxx	1000
xxxx	1000
xxxx	1000
xxxx	1000
xxxx	1000
xxxx	1000
xxxx	1000
xxxx	1000
xxxx	1000
xxxx	1000
xxxx	1000
xxxx	1000
xxxx	1000
xxxx	1000
xxxx	1000
xxxx	1000
xxxx	1000
xxxx	1000
xxxx	1000
xxxx	1000
xxxx	1000
xxxx	1000
xxxx	1000
xxxx	1000
xxxx	1000
xxxx	1000
xxxx	1000
xxxx	1000
xxxx	1000
xxxx	1000
xxxx	1000
xxxx	1000
xxxx	1000
xxxx	1000
xxxx	1000
xxxx	1000
xxxx	1000
xxxx	1000
xxxx	1000
xxxx	1000
xxxx	1000
xxxx	1000
xxxx	1000
xxxx	1000
xxxx	1000
xxxx	1000
xxxx	1000
xxxx	1000
xxxx	1000
xxxx	1000
xxxx	1000
xxxx	1000
xxxx	1000
xxxx	1000
xxxx	1000
xxxx	1000
xxxx	1000
xxxx	1000
xxxx	1000
xxxx	1000
xxxx	1000
xxxx	1000
xxxx	1000
xxxx	1000
xxxx	1000
xxxx	1000
xxxx	1000
xxxx	1000
xxxx	1000
xxxx	1000
Paraquat	1000
xxxx	1000
xxxx	1000
xxxx	1000
xxxx	1000
xxxx	1000
xxxx	1000
xxxx	1000
xxxx	1000
xxxx	1000
xxxx	1000
xxxx	1000
xxxx	1000
xxxx	1000
xxxx	1000
xxxx	1000
xxxx	1000
xxxx	1000
xxxx	1000
xxxx	1000
xxxx	1000
xxxx	1000
xxxx	1000
xxxx	1000
xxxx	1000
xxxx	1000
xxxx	1000
xxxx	1000
xxxx	1000
xxxx	1000
xxxx	1000
xxxx	1000
xxxx	1000
xxxx	1000
xxxx	1000
xxxx	1000
xxxx	1000
xxxx	1000
xxxx	1000
xxxx	1000
xxxx	1000
xxxx	1000
xxxx	1000
xxxx	1000
xxxx	1000
xxxx	1000
xxxx	1000
xxxx	1000
xxxx	1000
xxxx	1000
xxxx	1000
xxxx	1000
xxxx	1000
xxxx	1000
xxxx	1000
xxxx	1000
xxxx	1000
xxxx	1000
xxxx	1000
xxxx	1000
xxxx	1000
xxxx	1000
xxxx	1000
xxxx	1000
xxxx	1000
xxxx	1000
xxxx	1000
xxxx	1000
xxxx	1000
xxxx	1000
xxxx	1000
xxxx	1000
xxxx	1000
xxxx	1000
xxxx	1000
xxxx	1000
xxxx	1000
xxxx	1000
xxxx	1000
xxxx	1000
xxxx	1000
xxxx	1000
xxxx	1000
xxxx	1000
xxxx	1000
xxxx	1000
xxxx	1000
xxxx	1000
xxxx	1000
xxxx	1000
xxxx	1000
xxxx	1000
xxxx	1000
xxxx	1000
xxxx	1000
xxxx	1000
xxxx	1000
xxxx	1000
xxxx	1000
xxxx	1000
xxxx	1000
xxxx	1000
xxxx	1000
xxxx	1000
xxxx	1000
xxxx	1000
xxxx	1000
xxxx	1000
xxxx	1000
xxxx	1000
xxxx	1000
xxxx	1000
xxxx	1000
xxxx	1000
xxxx	1000
xxxx	1000
xxxx	1000
xxxx	1000
xxxx	1000
xxxx	1000
xxxx	1000
xxxx	1000
xxxx	1000
xxxx	1000
xxxx	1000
xxxx	1000
xxxx	1000
xxxx	1000
xxxx	1000
xxxx	1000
xxxx	1000
xxxx	1000
xxxx	1000
xxxx	1000
